# Supplementary material for: Early hepatocellular carcinoma detection using magnetic resonance imaging is cost-effective in high-risk patients with cirrhosis
Source: PubMed Central journal article supplement (PMC8683591; doi:10.1016/j.jhepr.2021.100390), 2021-11-04
Supplement: mmc1.pdf [file mmc1.pdf]

**Early hepatocellular carcinoma detection using magnetic resonance imaging is cost-effective in high-risk patients with cirrhosis**

Pierre Nahon, Marie Najean, Richard Layese, Kevin Zarca, Laetitia Blampain Segar, Carole Cagnot, Nathalie Ganne-Carrié, Gisèle N’Kontchou, Stanislas Pol, Cendrine Chaffaut, Fabrice Carrat, Maxime Ronot, Etienne Audureau, Isabelle Durand-Zaleski for the ANRS CO12 CirVir, ANRS CO22 Hepather, and CIRRAL groups

Table of contents

Fig. S1.....2

Fig. S2.....3

Fig. S3.....4

Fig. S4.....5

Fig. S5.....6

Fig. S6.....7

Table S1.....8

Table S2.....9

Table S3.....12

Table S4.....13

Table S5.....14

Table S6.....15

Table S7.....16

Table S8.....17

Table S9.....18

**Fig. S1.** Full Markov Model. The “posttreatment” states are not represented but are implied in the treatment states for easier graphic representation. LT: liver transplantation; LR: liver resection; RFA: radiofrequency ablation; RFA-1: 1<sup>st</sup> line RFA; RFA-2: 2<sup>nd</sup> line RFA; TACE: transarterial chemoembolization. Death can occur in any health state.

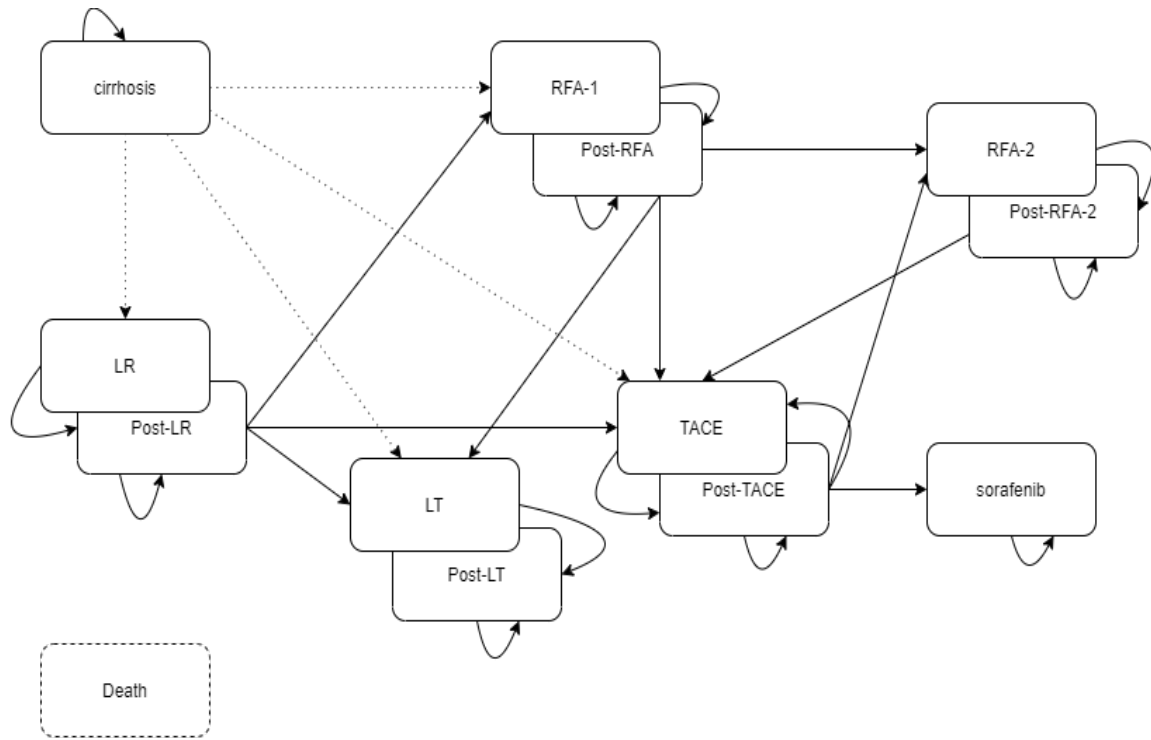

**Fig. S2.** Flow chart of the study.

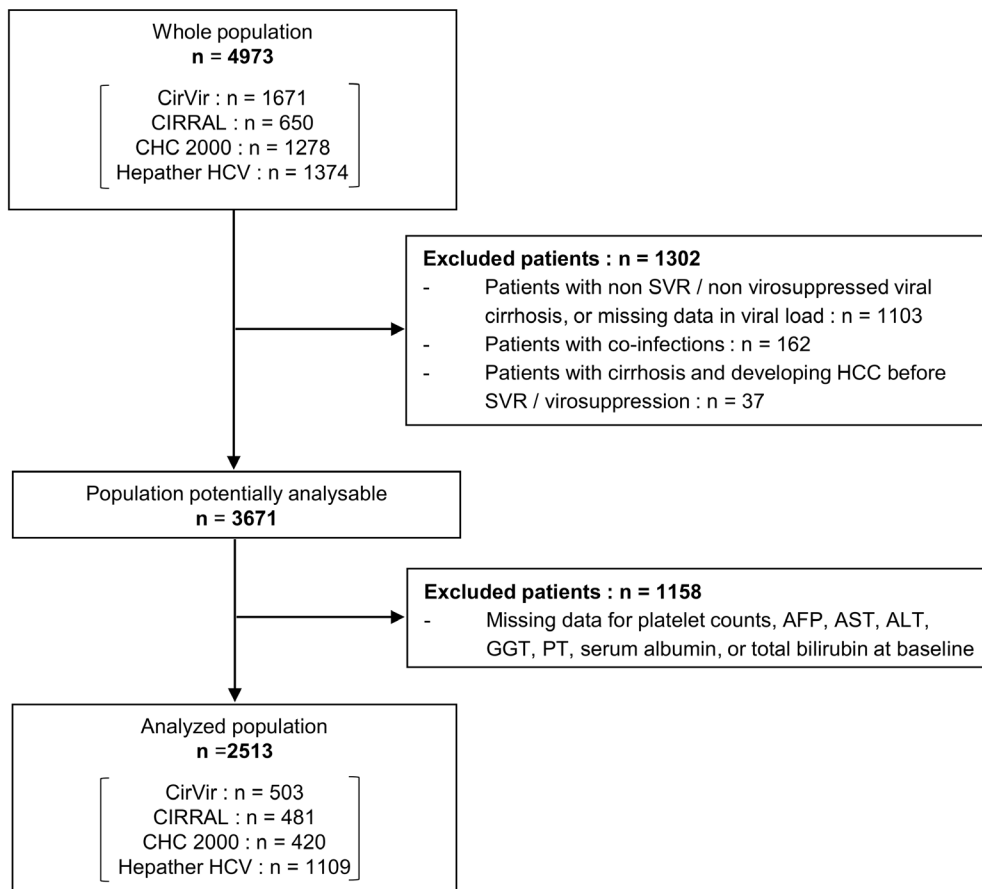

**Fig. S3.** Outcomes of the excluded and analysed populations: A. HCC incidence; B. Overall survival.

**A**

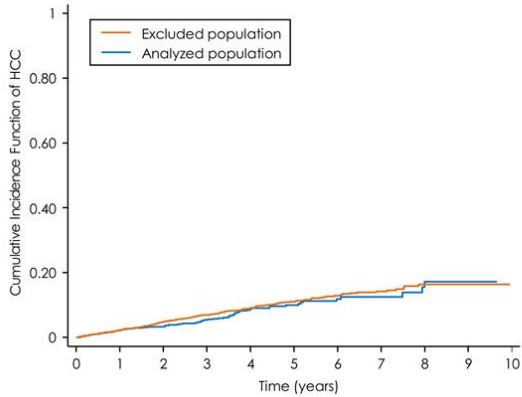

**B**

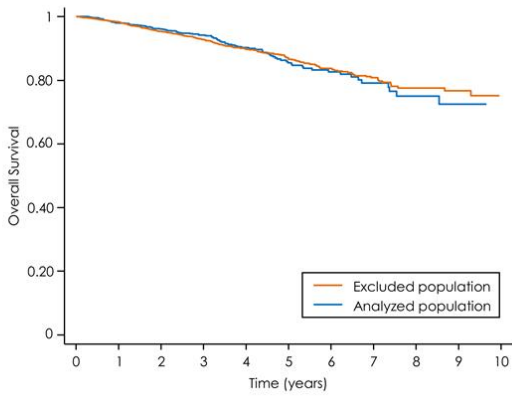

**Fig. S4.** Outcomes of the training and validation sets: A. HCC incidence; B. overall survival.

**A**

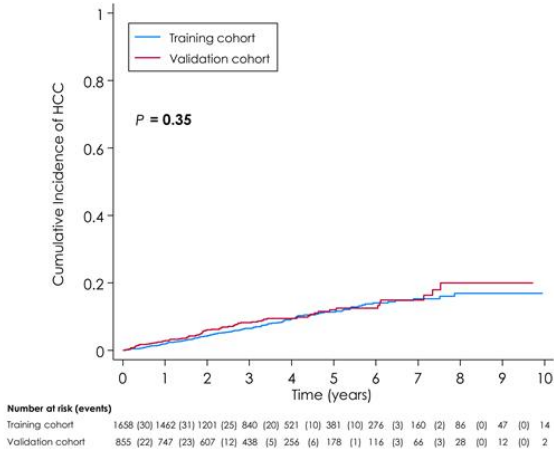

**B**

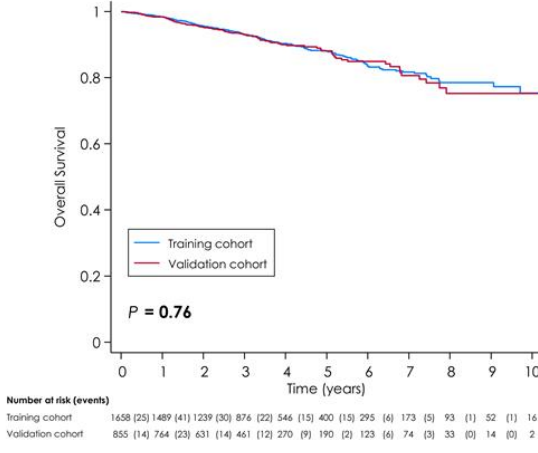

**Fig. S5.** Calibration of the model in the derivation and validation cohorts.

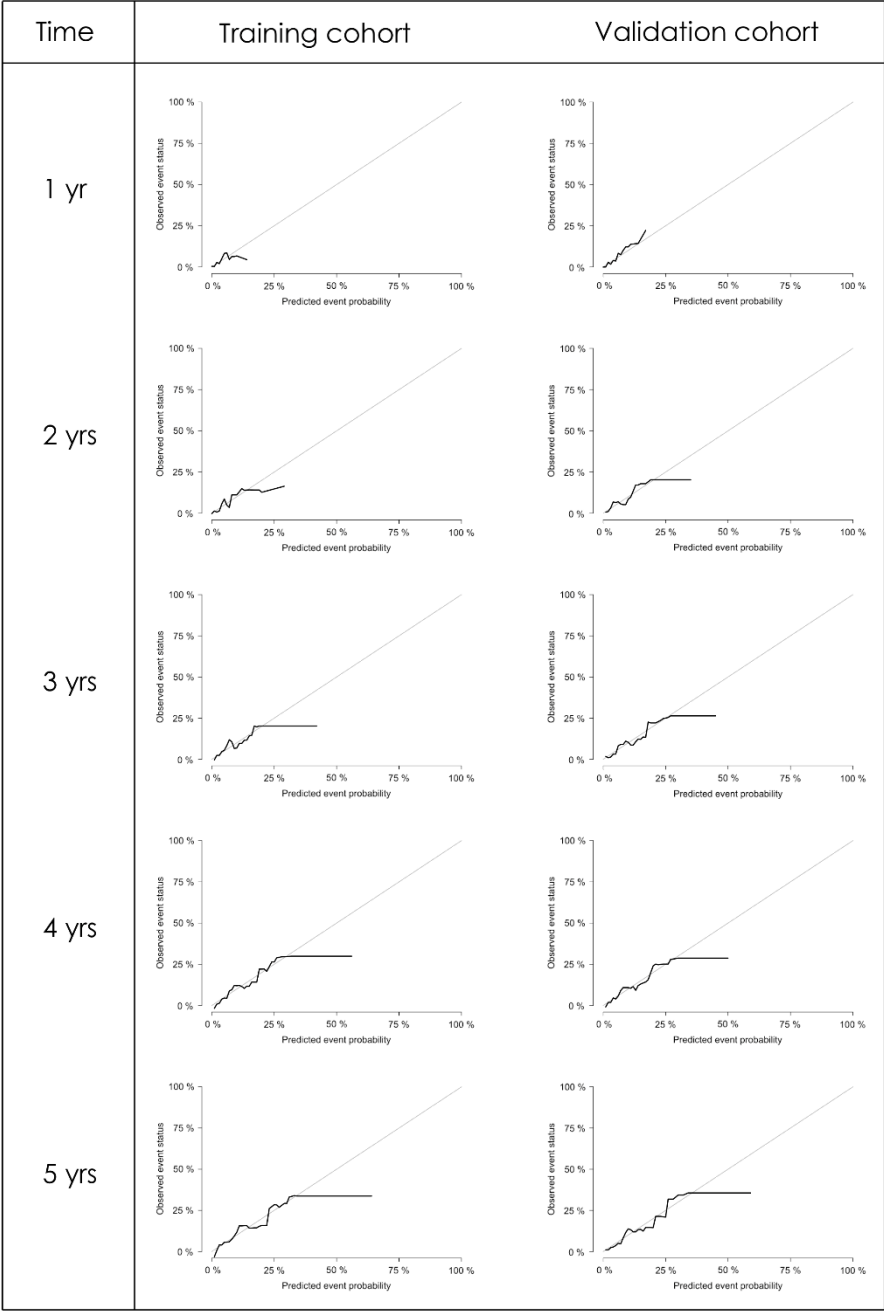

**Fig. S6.** Full Tornado diagram.

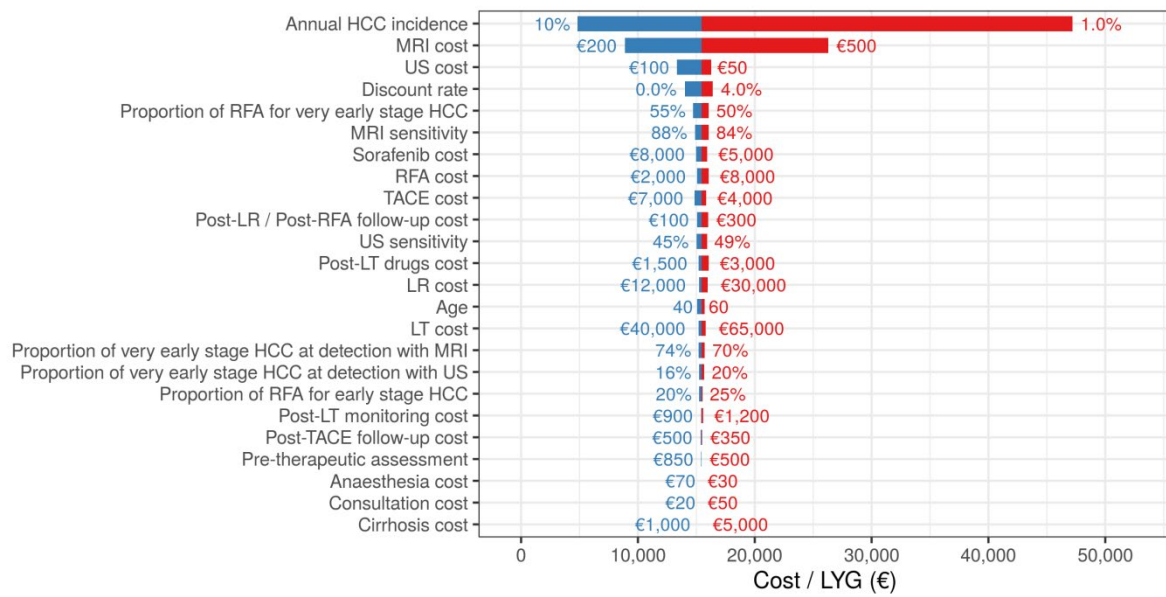

**Table S1.** Expected distribution of treatments depending on HCC stage at the time of detection.

| Treatment       | Very early stage (BCLC 0) | Early stage (BCLC A) |
|-----------------|---------------------------|----------------------|
| Transplantation | 4.3%                      | 5.3%                 |
| Hepatectomy     | 13.0%                     | 15.8%                |
| Radiofrequency  | 52.2%                     | 23.7%                |
| TACE            | 30.4%                     | 55.3%                |



**Table S2.** Transition probabilities and proportions used in the Markov model.

| Markov Model parameters                                                                                 | Baseline value    | Sources         | One-way sensitivity analysis               | Probabilistic sensitivity analysis       |
|---------------------------------------------------------------------------------------------------------|-------------------|-----------------|--------------------------------------------|------------------------------------------|
| Age at model entry (years)                                                                              | 55                |                 | 40-60                                      | Normal distribution: mean=55, sd=5       |
| Mortality rate                                                                                          | Natural mortality | WHO life tables |                                            |                                          |
| Annual HCC incidence                                                                                    | 3%                |                 | 1-10%                                      | Uniform distribution: min=1, max=10      |
| 3-month incidence of HCC                                                                                | 0.7%              |                 | <i>Calculated from annual incidence</i>    | <i>Calculated from annual incidence</i>  |
| HCC stages at the time of detection according to screening method (very early = BCLC 0, early = BCLC A) |                   |                 |                                            |                                          |
| MRI                                                                                                     |                   |                 |                                            |                                          |
| very early                                                                                              | 72.1%             | [7]             | 70%-74%                                    | Uniform distribution: min=70, max=74     |
| early                                                                                                   | 25.6%             | [7]             | <i>Calculated (1 - very early - other)</i> | <i>calculated</i>                        |
| others                                                                                                  | 2.3%              | [7]             | 2.3%                                       | 2.3%                                     |
| US                                                                                                      |                   |                 |                                            |                                          |
| very early                                                                                              | 18.5%             | [7]             | 16.5%-20.5%                                | Uniform distribution: min=16.5, max=20.5 |
| early                                                                                                   | 43.3%             | [7]             | <i>Calculated (1 - very early - other)</i> | <i>Calculated</i>                        |
| others                                                                                                  | 38.2%             | [7]             | 38.2%                                      | 38.2%                                    |
| MRI sensitivity                                                                                         | 85.7%             | [7]             | 83.7%-87.7%                                | Uniform distribution: min=83.7, max=87.7 |
| US sensitivity                                                                                          | 47.0%             | [7]             | 45%-49%                                    | Uniform distribution: min=45, max=49     |
| Treatment proportion in very early-stage HCC                                                            |                   |                 |                                            |                                          |
| LT                                                                                                      | 4.3%              | [7]             | 4.3%                                       | 4.3%                                     |
| Resection                                                                                               | 13.0%             | [7]             | 13.0%                                      | 13.0%                                    |
| RFA                                                                                                     | 52.2%             | [7]             | 50%-55%                                    | Uniform distribution: min=50, max=55     |

|                                                                                                                                                                                            |                           |     |            |                                            |
|--------------------------------------------------------------------------------------------------------------------------------------------------------------------------------------------|---------------------------|-----|------------|--------------------------------------------|
| TACE                                                                                                                                                                                       | 30.4%                     | [7] | Calculated | Calculated                                 |
| Treatment proportion in early-stage HCC                                                                                                                                                    |                           |     |            |                                            |
| LT                                                                                                                                                                                         | 5.3%                      | [7] | 5.3%       |                                            |
| Resection                                                                                                                                                                                  | 15.8%                     | [7] | 15.8%      |                                            |
| RFA                                                                                                                                                                                        | 23.7%                     | [7] | 20%-25%    | Uniform distribution:<br>min=20,<br>max=25 |
| TACE                                                                                                                                                                                       | 55.3%                     | [7] | Calculated | Calculated                                 |
| Treatment proportion in other stages                                                                                                                                                       |                           |     |            |                                            |
| TACE                                                                                                                                                                                       | 100%                      | [7] |            |                                            |
| Probability of diagnosis with MRI screening                                                                                                                                                |                           |     |            |                                            |
| At very early stage                                                                                                                                                                        | 63.2% †                   | [7] | †          | †                                          |
| At early stage                                                                                                                                                                             | 22.4% ‡                   | [7] | ‡          | ‡                                          |
| At other stages                                                                                                                                                                            | 14.3% §                   | [7] | §          | §                                          |
| Probability of diagnosis with US screening                                                                                                                                                 |                           |     |            |                                            |
| At very early stage                                                                                                                                                                        | 14.0% †                   | [7] | †          | †                                          |
| At early stage                                                                                                                                                                             | 32.9% ‡                   | [7] | ‡          | ‡                                          |
| At other stage                                                                                                                                                                             | 53.0% §                   | [7] | §          | §                                          |
| Probability of transition for a 3-month cycle                                                                                                                                              |                           |     |            |                                            |
| From cirrhosis with US screening                                                                                                                                                           |                           |     |            |                                            |
| To resection                                                                                                                                                                               | 0.7% #                    | [7] | #          | #                                          |
| To RFA                                                                                                                                                                                     | 0.05% *                   | [7] | *          | *                                          |
| To RFA (very early)<br><i>The state "RFA (very early)" is a subset of the state "RFA". It was created to allow counting the patients diagnosed at very early stage in both strategies.</i> | 0.05% **                  | [7] | **         | **                                         |
| To LT                                                                                                                                                                                      | 0.01% ¶                   | [7] | ¶          | ¶                                          |
| To TACE                                                                                                                                                                                    | 0.9%                      | [7] |            |                                            |
| To death                                                                                                                                                                                   | Natural mortality         | [2] |            |                                            |
| From cirrhosis with MRI screening                                                                                                                                                          |                           |     |            |                                            |
| To resection                                                                                                                                                                               | 0.08% #                   | [7] | #          | #                                          |
| To RFA                                                                                                                                                                                     | 0.03% *                   | [7] | *          | *                                          |
| To RFA (very early)                                                                                                                                                                        | 0.2% **                   | [7] | **         | **                                         |
| To LT                                                                                                                                                                                      | 0.02% ¶                   | [7] | ¶          | ¶                                          |
| To TACE                                                                                                                                                                                    | 0.9%                      | [7] |            |                                            |
| To death                                                                                                                                                                                   | Natural mortality         | [2] |            |                                            |
| From resection                                                                                                                                                                             |                           |     |            |                                            |
| To death                                                                                                                                                                                   | Natural mortality + 0.045 | [2] |            |                                            |
| From post-resection                                                                                                                                                                        |                           |     |            |                                            |
| To RFA                                                                                                                                                                                     | 0.4%                      | [2] |            |                                            |
| To LT                                                                                                                                                                                      | 0.4%                      | [2] |            |                                            |
| To TACE                                                                                                                                                                                    | 0.4%                      | [2] |            |                                            |
| To death                                                                                                                                                                                   | Natural mortality         | [2] |            |                                            |
| From RFA or RFA (very early)                                                                                                                                                               |                           |     |            |                                            |
| To death                                                                                                                                                                                   | Natural mortality + 0.012 | [2] |            |                                            |
| From post-RFA                                                                                                                                                                              |                           |     |            |                                            |
| To RFA                                                                                                                                                                                     | 0.4%                      | [2] |            |                                            |
| To LT                                                                                                                                                                                      | 0.4%                      | [2] |            |                                            |
| To TACE                                                                                                                                                                                    | 12.7%                     | [2] |            |                                            |
| To death                                                                                                                                                                                   | Natural mortality         | [2] |            |                                            |

|                 |                           |     |       |                                    |
|-----------------|---------------------------|-----|-------|------------------------------------|
| From RFA-2      |                           |     |       |                                    |
| To death        | Natural mortality + 0.012 | [2] |       |                                    |
| From post-RFA-2 |                           | [2] |       |                                    |
| To LT           | 1.2%                      | [2] |       |                                    |
| To TACE         | 0.8%                      | [2] |       |                                    |
| To death        | Natural mortality         | [2] |       |                                    |
| From LT         |                           |     |       |                                    |
| To death        | 8.0%                      | [2] |       |                                    |
| From post-LT    |                           |     |       |                                    |
| To death        | 1.2%                      | [2] |       |                                    |
| From TACE       |                           |     |       |                                    |
| To death        | 5.7%                      | [2] |       |                                    |
| From post-TACE  |                           |     |       |                                    |
| To RFA-2        | 7.3%                      | [2] |       |                                    |
| To TACE         | 12.5%                     | [2] |       |                                    |
| To sorafenib    | 6.1%                      | [2] |       |                                    |
| To death        | 5.7%                      | [2] |       |                                    |
| From sorafenib  |                           |     |       |                                    |
| To death        | 15.9%                     | [2] |       |                                    |
|                 |                           |     |       |                                    |
| Discount rate   | 2.5%                      |     | 0%-4% | Uniform distribution: min=0, max=4 |
|                 |                           |     |       |                                    |

WHO life tables available at: <https://apps.who.int/gho/data/view.main.60580?lang=en>

† Sensitivity × [(% of very early stage)/(% of very early stage + % of early stage)].

‡ Sensitivity × [(% of early stage)/(% of very early stage + % of early stage)].

§ 1-Sensitivity.

# HCC incidence x [(proba of detection at very early stage x proba of resection at very early stage) + (proba of detection at early stage x proba of resection at early stage)]

\* HCC incidence x (proba of detection at early stage x proba of RFA at early stage)

\*\* HCC incidence x (proba of detection at very early stage x proba of RFA at very early stage)

¶ HCC incidence x [(proba of detection at very early stage x proba of transplantation at very early stage) + (proba of detection at early stage x proba of transplantation at early stage)]

| HCC incidence x [(proba of detection at very early stage x proba of TACE at very early stage) + (proba of detection at early stage x proba of TACE at early stage) + (proba of detection at advanced stage x proba of TACE at advanced stage)]

**Table S3.** Unit costs in 2020 €

| Cost (2020 €)                                |        |                                                         | One-way sensitivity analysis | Probabilistic sensitivity analysis (mean; sd) |
|----------------------------------------------|--------|---------------------------------------------------------|------------------------------|-----------------------------------------------|
| Cirrhosis                                    | 1,855  | Social health insurance report 2021 (Yearly ALD cost/4) | 1000 - 5000                  | 1,855, 750                                    |
| Consultation (medical doctor)                | 28     | Social health insurance fee schedule                    | 20-50                        | 28, 5                                         |
| US                                           | 64     | Social health insurance fee schedule 2020               | 50-100                       | 64, 10                                        |
| MRI                                          | 313    | Social health insurance fee schedule 2020               | 200-500                      | 313, 70                                       |
| Screening programme with US (3-month cycle)  | 46     | (Consultation + US)/2                                   |                              |                                               |
| Screening programme with MRI (3-month cycle) | 170.5  | (Consultation + MRI)/2                                  |                              |                                               |
| Anaesthesiologist consultation               | 46     | Social health insurance fee schedule 2020               | 30-70                        | 46, 5                                         |
| Pre-therapeutic assessment                   | 658    | [2]                                                     | 500-850                      | 658, 65                                       |
| Resection                                    | 17,130 | [2]                                                     | 12,000-30,000                | 17,130, 1,700                                 |
| Post-resection follow-up                     | 177    | [2]                                                     | 100-300                      | 177, 20                                       |
| RFA                                          | 4,359  | [2]                                                     | 2,000-8,000                  | 4,359, 850                                    |
| Post-RFA follow-up                           | 177    | [2]                                                     | 100-300                      | 177, 20                                       |
| LT                                           | 51,253 | [2]                                                     | 40,000-65,000                | 51,253, 5,000                                 |
| Post-LT follow-up                            | 976    | [2]                                                     | 900-1,200                    | 976, 50                                       |
| Post-LT drugs                                | 1,953  | [2]                                                     | 1,500-3,000                  | 1,953, 200                                    |
| TACE                                         | 5,172  | [2]                                                     | 4,000-7,000                  | 5,172, 500                                    |
| Post-TACE follow-up                          | 409    | [2]                                                     | 350-500                      | 409, 40                                       |
| Sorafenib                                    | 6,529  | [2]                                                     | 5,000-8,000                  | 6,529, 600                                    |

For the probabilistic sensitivity analysis, gamma distributions were applied to the costs, according to the means and standard deviations presented in this table. The parameters for the gamma distributions were estimated with the method of moments.

**Table S4.** Comparison of baseline characteristics of analysed versus not analysed populations.

| Characteristics      | Available data | Analysed population<br>N=2513 | No analysed population<br>N=1158 | P value |
|----------------------|----------------|-------------------------------|----------------------------------|---------|
| Age                  | 3662           | 58 [51.6-65.9]                | 57 [51-64.8]                     | 0.006   |
| Age                  | 3662           |                               |                                  | 0.027   |
| ≤60                  |                | 1486 (59.1)                   | 733 (63.8)                       |         |
| ]60 ; 65]            |                | 373 (14.8)                    | 154 (13.4)                       |         |
| >65                  |                | 654 (26.0)                    | 262 (22.8)                       |         |
| Male sex             | 3654           | 1690 (67.3)                   | 768 (67.3)                       | 0.972   |
| Platelet count       | 3524           | 153 [111-201]                 | 155 [106-198]                    | 0.679   |
| Platelet count≤120   | 3524           | 777 (30.9)                    | 325 (32.2)                       | 0.477   |
| ASAT                 | 3532           | 30 [24-42]                    | 32 [24-43]                       | 0.127   |
| ASAT x N (N=40)      | 3532           | 675 (26.9)                    | 289 (28.4)                       | 0.364   |
| ALAT                 | 3538           | 27 [20-39]                    | 27 [20-40]                       | 0.915   |
| ALAT x N (N=40)      | 3538           | 580 (23.1)                    | 245 (23.9)                       | 0.600   |
| GGT                  | 3442           | 56 [31-120]                   | 55 [30-119]                      | 0.988   |
| GGT x 1.5.N (N=45)   | 3442           | 1080 (43.0)                   | 387 (41.7)                       | 0.487   |
| TP                   | 3324           | 85 [74-95]                    | 85 [72-96]                       | 0.757   |
| TP≤90                | 3324           | 889 (35.4)                    | 305 (37.6)                       | 0.249   |
| Albumin              | 3302           | 42 [38.3-45]                  | 42 [38-44.8]                     | 0.493   |
| Albumin≤40           | 3302           | 952 (37.9)                    | 303 (38.4)                       | 0.793   |
| Total bilirubin      | 3404           | 11.3 [8-17.1]                 | 12 [8-18]                        | 0.031   |
| Total bilirubin>12   | 3404           | 1111 (44.2)                   | 426 (47.8)                       | 0.063   |
| AFP                  | 2880           | 5.1 [3-10]                    | 4 [2.6-6]                        | <0.001  |
| AFP > 5              | 2880           | 1262 (50.2)                   | 124 (33.8)                       | <0.001  |
| Cirrhosis aetiology  |                |                               |                                  | 0.110   |
| Cured HCV            |                | 1489 (59.3)                   | 711 (61.4)                       |         |
| Controlled HBV       |                | 184 (7.3)                     | 64 (5.5)                         |         |
| Alcohol or metabolic |                | 840 (33.4)                    | 383 (33.1)                       |         |

**Table S5.** Baseline characteristics of patients as a function of subsequent HCC development: results from univariate analyses using a Fine-Gray regression models.

| Variables                                          | No HCC<br>N=1527 | HCC<br>N=131   | SHR [95% CI]          | P value |
|----------------------------------------------------|------------------|----------------|-----------------------|---------|
| Male sex                                           | 1002 (65.6)      | 101 (77.1)     | 1.69 [1.12 ; 2.54]    | 0.012   |
| Age (years)                                        | 58.2±10.7        | 62.2±10.1      | 1.04 [1.02 ; 1.06]    | <0.001  |
| Age (years)                                        |                  |                |                       | <0.001  |
| ≤60                                                | 925 (60.6)       | 55 (42.0)      | Ref                   |         |
| ]60 ; 65]                                          | 228 (14.9)       | 26 (19.9)      | 1.88 [1.18 ; 2.98]    | 0.008   |
| >65                                                | 374 (24.5)       | 50 (38.2)      | 2.40 [1.64 ; 3.52]    | <0.001  |
| Platelet count (10 <sup>3</sup> /mm <sup>3</sup> ) | 156 [115-203]    | 123 [90-178]   | 0.993 [0.990 ; 0.996] | <0.001  |
| Platelet count ≤120                                | 436 (28.6)       | 65 (49.6)      | 2.47 [1.75; 3.48]     | <0.001  |
| AST (UI)                                           | 30 [24-40]       | 37 [28-59]     | 1.00 [1.00 ; 1.01]    | <0.001  |
| AST>40                                             | 378 (24.8)       | 59 (45.0)      | 2.28 [1.62 ; 3.22]    | <0.001  |
| AST>ULN                                            | 378 (24.8)       | 59 (45.0)      | 2.28 [1.62 ; 3.22]    | <0.001  |
| ALT (UI)                                           | 27 [20-39]       | 29 [22-43]     | 1.01 [1.00 ; 1.01]    | 0.005   |
| ALT>35                                             | 457 (29.9)       | 53 (40.5)      | 1.45 [1.02 ; 2.05]    | 0.036   |
| ALT>0.9 ULN                                        | 439 (28.8)       | 52 (39.7)      | 1.47 [1.04 ; 2.08]    | 0.029   |
| ALT>ULN                                            | 344 (22.5)       | 37 (28.2)      | 1.27 [0.87 ; 1.84]    | 0.218   |
| GGT (UI)                                           | 52 [30-111]      | 104 [51-181]   | 1.001 [1.000 ; 1.001] | <0.001  |
| GGT>60                                             | 668 (43.8)       | 92 (70.2)      | 2.82 [1.93 ; 4.11]    | <0.001  |
| GGT>1.5 ULN                                        | 613 (40.1)       | 87 (66.4)      | 2.77 [1.93 ; 3.99]    | <0.001  |
| Prothrombin time (%)                               | 86 [74-95]       | 78 [70-89]     | 0.98 [0.98 ; 0.99]    | <0.001  |
| Prothrombin time≤90                                | 567 (63.3)       | 103 (78.6)     | 2.06 [1.36 ; 3.12]    | 0.001   |
| Albuminemia (g/L)                                  | 42 [38.4-45]     | 40 [36.3-42.6] | 0.96 [0.94 ; 0.97]    | <0.001  |
| Albuminemia≤40                                     | 568 (37.2)       | 67 (51.2)      | 1.79 [1.27 ; 2.52]    | 0.001   |
| Total bilirubin (μmol/L)                           | 11 [8-16.9]      | 14 [10-24]     | 1.01 [1.01 ; 1.02]    | <0.001  |
| Total bilirubin >12                                | 629 (41.2)       | 83 (63.4)      | 2.34 [1.64 ; 3.34]    | <0.001  |
| AFP (ng/mL)                                        | 5 [3-10.1]       | 7 [4-12]       | 1.00 [0.99 ; 1.00]    | 0.404   |
| AFP > 5                                            | 743 (48.7)       | 84 (64.1)      | 2.88 [1.98 ; 4.17]    | <0.001  |

**Table S6.** Variables and corresponding thresholds used for the association with HCC development (univariate analysis).

| <b>Variables</b> | <b>Thresholds</b> |
|------------------|-------------------|
| Age              | ≤60 and >65       |
| Platelet count   | ≤120              |
| AFP              | >5.               |
| PT               | ≤90               |
| GGT              | >60               |
| GGT ratio        | >1.5 ULN          |
| Total bilirubin  | >12               |
| AST              | >40               |
| AST ratio        | >1 ULN            |
| ALT              | >35               |
| ALT ratio        | >0.9 ULN          |
| Albuminemia      | >40               |

**Table S7.** Time-dependent sensitivity and specificity of HCC score in the training set.

| Cut-offs | 1 year |       | 2 years |       | 3 years |       | 4 years |       | 5 years |       |
|----------|--------|-------|---------|-------|---------|-------|---------|-------|---------|-------|
|          | Sens   | Spe   | Sens    | Spe   | Sens    | Spe   | Sens    | Spe   | Sens    | Spe   |
| 0        | 100    | 3.14  | 100     | 3.23  | 100     | 3.29  | 100     | 4.15  | 100     | 5.12  |
| 1        | 100    | 3.14  | 100     | 3.18  | 100     | 3.18  | 100     | 3.87  | 100     | 4.63  |
| 2        | 100    | 13.01 | 100     | 13.34 | 100     | 14.43 | 98.86   | 16.38 | 97.75   | 17.85 |
| 3        | 96.72  | 16.18 | 98.48   | 16.24 | 99.03   | 16.42 | 98.21   | 17.64 | 97.20   | 19.26 |
| 4        | 93.38  | 25.93 | 91.81   | 26.18 | 94.74   | 27.64 | 95.33   | 30.41 | 93.41   | 33.66 |
| 5        | 93.38  | 37.86 | 90.05   | 37.71 | 93.61   | 38.96 | 92.08   | 39.60 | 87.87   | 42.44 |
| 6        | 90.07  | 45.30 | 88.52   | 45.44 | 88.79   | 46.82 | 88.85   | 47.94 | 85.17   | 49.07 |
| 7        | 90.07  | 59.96 | 85.09   | 60.31 | 78.36   | 60.33 | 77.84   | 60.62 | 75.99   | 59.91 |
| 8        | 80.30  | 67.06 | 78.98   | 67.00 | 70.13   | 66.78 | 69.71   | 67.61 | 67.69   | 66.43 |
| 9        | 64.09  | 78.35 | 52.64   | 77.79 | 48.94   | 77.17 | 54.08   | 78.52 | 50.94   | 78.11 |
| 10       | 53.99  | 84.82 | 46.22   | 84.45 | 44.82   | 84.32 | 49.46   | 85.41 | 45.33   | 84.55 |
| 11       | 37.25  | 90.33 | 33.50   | 90.19 | 32.53   | 89.92 | 35.39   | 90.16 | 33.60   | 89.92 |
| 12       | 13.55  | 96.14 | 13.75   | 96.00 | 15.01   | 95.66 | 16.23   | 96.06 | 13.53   | 95.00 |
| 13       | 10.08  | 97.25 | 12.15   | 97.27 | 13.98   | 97.27 | 13.35   | 97.63 | 11.13   | 97.27 |
| 14       | 3.39   | 99.29 | 3.52    | 99.25 | 5.64    | 99.19 | 5.86    | 99.31 | 4.88    | 98.86 |
| 15       | 3.39   | 99.29 | 3.52    | 99.25 | 5.64    | 99.19 | 5.86    | 99.31 | 4.88    | 98.86 |

Sens: sensitivity, Spe: specificity



**Table S8.** Time-dependent sensitivity and specificity of HCC score in the validation set.

| Cut-offs | 1 year |       | 2 years |       | 3 years |       | 4 years |       | 5 years |       |
|----------|--------|-------|---------|-------|---------|-------|---------|-------|---------|-------|
|          | Sens   | Spe   | Sens    | Spe   | Sens    | Spe   | Sens    | Spe   | Sens    | Spe   |
| 0        | 100    | 3.07  | 100     | 3.38  | 100     | 3.31  | 100     | 3.73  | 100     | 3.76  |
| 1        | 100    | 3.07  | 100     | 3.38  | 100     | 3.31  | 100     | 3.73  | 100     | 3.76  |
| 2        | 100    | 13.11 | 100     | 13.98 | 100     | 15.14 | 97.94   | 17.14 | 95.91   | 18.69 |
| 3        | 100    | 16.73 | 97.79   | 17.59 | 98.38   | 17.82 | 96.53   | 19.09 | 94.81   | 20.77 |
| 4        | 100    | 24.77 | 91.04   | 25.83 | 93.45   | 27.02 | 92.23   | 29.67 | 91.46   | 31.59 |
| 5        | 100    | 35.70 | 91.04   | 36.57 | 91.36   | 37.26 | 90.41   | 37.87 | 90.05   | 38.99 |
| 6        | 95.57  | 43.80 | 80.03   | 44.51 | 83.31   | 45.80 | 80.90   | 45.63 | 79.28   | 47.30 |
| 7        | 82.11  | 57.83 | 71.76   | 58.42 | 77.26   | 59.76 | 73.09   | 57.83 | 73.20   | 55.73 |
| 8        | 82.11  | 63.23 | 69.60   | 63.98 | 71.70   | 64.33 | 68.24   | 63.74 | 69.43   | 62.50 |
| 9        | 77.62  | 74.36 | 67.56   | 75.89 | 65.53   | 76.50 | 62.88   | 72.40 | 58.06   | 70.36 |
| 10       | 68.56  | 82.61 | 55.92   | 84.35 | 55.10   | 84.45 | 53.78   | 81.42 | 50.98   | 80.18 |
| 11       | 59.42  | 86.89 | 49.40   | 88.46 | 48.23   | 88.63 | 45.35   | 86.61 | 40.16   | 85.68 |
| 12       | 32.06  | 94.28 | 29.72   | 94.71 | 31.53   | 95.96 | 27.47   | 94.34 | 26.24   | 93.82 |
| 13       | 18.26  | 96.05 | 18.62   | 96.08 | 18.36   | 97.00 | 15.99   | 96.28 | 12.45   | 95.85 |
| 14       | 9.38   | 99.45 | 4.26    | 99.46 | 3.12    | 99.49 | 2.72    | 99.11 | 2.11    | 99.77 |
| 15       | 9.38   | 99.45 | 4.26    | 99.46 | 3.12    | 99.49 | 2.72    | 99.11 | 2.11    | 99.77 |

Sens: sensitivity, Spe : specificity

**Table S9.** Deterministic sensitivity analyses (1000 patients)

For a yearly HCC incidence of 1%

| <b>Strategy</b> | <b>Cost per patient</b> | <b>LYG</b> | <b>ICER</b>        |
|-----------------|-------------------------|------------|--------------------|
| Reference (US)  | 108,197                 | 14.34      |                    |
| IRM             | 115,001                 | 14.48      |                    |
| ICER            |                         |            | <b>46,368€/LYG</b> |

For a yearly HCC incidence of 2%

| <b>Strategy</b> | <b>Cost per patient</b> | <b>LYG</b> | <b>ICER</b>        |
|-----------------|-------------------------|------------|--------------------|
| Reference (US)  | 103,627                 | 13.84      |                    |
| IRM             | 109,898                 | 14.12      |                    |
| ICER            |                         |            | <b>22,514€/LYG</b> |
